# Supplementary material for: Unconscious information processing of table tennis athletes in a masked priming paradigm: an event-related potentials (ERP) study
Source: PeerJ. 2025 May 23;13:e19508. doi: 10.7717/peerj.19508 (PMC12105618; doi:10.7717/peerj.19508)
Supplement: Supplemental Information 1 — This includes personal information (e.g., sex, age, training years), the mean RTs, ERs, identification rates, P3 latency and P3 peak amplitude for table tennis athletes and non-athletes. [file peerj-13-19508-s001.xlsx]

## Sheet: Sheet1
Subject	Group 1=non-athlete, 2=table tennis athlete	Sex 1=male, 2=female	Age(years)	Years of training	Mean reaction times(ms)		Mean error rates（%）		d'	P3 latency(ms)																		P3 peak amplitude(μv)
					Congruent	Incongruent	Congruent	Incongruent		Congruent:Cz	Incongruent:Cz	Congruent:C1	Incongruent:C1	Congruent:C2	Incongruent:C2	Congruent:CPz	Incongruent:CPz	Congruent:CP1	Incongruent:CP1	Congruent:CP2	Incongruent:CP2	Congruent:Pz	Incongruent:Pz	Congruent:P1	Incongruent:P1	Congruent:P2	Incongruent:P2	Congruent:Cz	Incongruent:Cz	Congruent:C1	Incongruent:C1	Congruent:C2	Incongruent:C2	Congruent:CPz	Incongruent:CPz	Congruent:CP1	Incongruent:CP1	Congruent:CP2	Incongruent:CP2	Congruent:Pz	Incongruent:Pz	Congruent:P1	Incongruent:P1	Congruent:P2	Incongruent:P2
101	1	1	23		470.5	365.74	20	4	0.19	454	392	454	390	458	366	456	360	456	392	456	330	454	302	456	300	460	392	9.86	6.05	9.05	5.84	8.08	4.91	7.73	4.2	7.57	4.26	5.57	2.46	4.6	1.87	4.11	2.54	2.42	-0.58
102	1	1	20		492.15	392.44	4	1	-0.52	446	342	448	342	446	340	448	338	454	342	448	338	450	336	454	340	448	336	4.41	4.39	4.72	4.81	4.23	4.08	4.01	6.01	4.59	6.12	3.42	4.8	3.73	6.26	3.46	5.58	2.2	5.32
103	1	1	19		346.18	378.53	14	21	-0.78	650	468	654	466	644	472	698	470	660	464	698	470	698	462	698	462	698	472	10.59	7.85	9.98	7.92	8.81	6.84	7.33	4.75	5.78	3.94	5.65	3.19	5.1	0.5	3.68	0.84	4.13	0.63
104	1	1	20		530.92	386.37	7	2	-0.38	418	410	418	410	418	412	416	412	416	410	418	412	416	412	416	372	416	414	20.12	15.52	18.22	14.45	19.34	14.82	16.35	13.39	14.26	12.31	16.24	13.6	10.69	9.47	9.79	8.54	12.55	11.03
105	1	1	19		390.45	377.38	40	24	0.81	456	336	460	338	456	338	456	338	456	338	454	338	410	338	410	338	408	338	-0.87	3.23	-1.01	3.69	-0.04	2.2	-3.22	5.2	-4.27	4.75	1.14	1.86	-4.7	3.47	-5.16	4.52	-5.5	3.75
106	1	1	19		500.8	406.65	15	4	1.75	400	448	400	434	394	448	398	448	400	430	396	448	400	356	400	356	396	448	2.34	3.08	1.73	2.93	1.79	2.68	1.15	2.12	1.23	1.87	0.92	1.53	0.83	1.29	0.54	0.86	0.69	1.33
107	1	1	20		462.67	382.39	19	0	-0.34	412	414	438	414	438	414	440	416	496	416	440	418	442	420	444	420	442	420	7.27	7.57	6.56	6.97	6.64	7.08	7.61	8.17	7.16	7.77	7.08	7.59	7.65	8.74	8.36	8.86	6.74	7.97
108	1	1	18		476.62	374.79	12	7	-0.43	544	414	536	414	544	414	532	414	554	414	546	414	532	412	532	412	532	412	4.62	8.96	5.63	9.36	4.24	9.61	4.72	10.28	3.33	8.63	2.52	11.6	8.08	10.01	8.22	10.12	5.59	9.06
109	1	1	18		432.58	382.74	52	67	0.35	458	316	458	318	460	364	456	342	456	336	460	364	456	344	456	338	458	316	8.42	7.96	7.85	7.97	7.92	7.78	7.63	8.05	4.61	5.42	7.52	7.67	6.56	6.99	4.05	4.98	5.55	5.5
110	1	1	19		494.89	425.21	1	0	0	518	352	520	354	462	350	510	368	512	350	462	348	512	368	512	350	462	340	7.53	3.62	7.55	3.82	7.07	3.34	7.14	4	6.75	4.09	7.06	3.78	7.11	4.02	4.37	3.96	5.78	4.26
111	1	1	19		469.38	360.65	49	10	0	554	358	554	356	550	358	550	358	554	356	550	358	548	358	548	356	548	388	3.05	0.14	2.32	0.66	4.26	-0.54	3.54	0.76	1.7	0.99	3.42	-0.28	3.59	0.66	2.31	2.08	4.08	-0.26
112	1	1	18		435.79	388.59	15	10	-0.66	460	338	462	338	460	338	464	340	474	340	460	338	478	340	478	338	476	340	9.91	12.66	9.84	11.52	9.79	11.89	8.17	11.22	8.03	9.95	8.97	11.21	6.93	8.78	4.84	6.03	6.06	9.45
113	1	1	20		528.21	403.34	14	2	0.36	464	318	464	316	466	330	464	318	464	318	466	330	466	324	466	318	466	330	11.32	6.53	10.07	6.41	9.83	6.22	10.64	7.33	8.71	6.27	9.43	7.03	9.32	7.28	8.09	5.78	8.55	7.62
114	1	2	22		499.74	374.49	27	5	-0.53	480	342	478	342	480	344	478	344	478	346	480	344	478	348	476	348	478	350	8.7	11.21	7.95	10.49	7.85	10.09	9.45	11.81	9.88	10.89	7.91	10.16	7.27	10	8.01	9.75	5.18	8.19
115	1	2	20		608.78	481.36	6	0	0.08	550	344	550	476	550	446	568	476	566	476	568	474	566	476	566	476	568	476	16	12.32	17.22	12.78	12.76	10	10.46	7.69	11.83	8.64	8.95	6.26	2.55	2.12	5.69	4.25	3.73	2.54
116	1	2	20		400.34	354.82	17	10	0.76	490	446	490	446	488	446	490	446	492	446	488	444	492	446	514	446	478	446	16.54	13.69	14.23	12.33	16.19	12.79	16.71	14.65	13.7	12.28	15.84	12.96	15.9	14.07	12.29	10.95	14.46	11.66
117	1	2	20		496.94	403.93	12	1	-0.56	572	354	572	356	574	354	474	354	572	354	474	354	472	352	474	354	472	352	13.03	9.12	12.65	8.95	11.68	9.02	9.57	7.93	10.46	8.12	9.14	7.64	6.39	5.23	6.43	6.06	6.83	5.13
118	1	2	20		465.99	373.13	13	2	0.36	476	360	472	360	472	358	424	362	472	362	430	364	472	364	472	364	472	364	0.6	2.26	0.02	1.65	0.53	2.33	1.01	2.95	0.61	1.98	1.5	3.58	1.13	3.16	0.1	1.73	1.99	3.8
119	1	2	22		413.38	414	5	6	-0.31	434	350	434	350	540	352	542	360	476	354	542	358	476	362	476	362	544	360	11.54	10.39	9.6	9.88	10.05	8.73	9.06	8.1	7.21	6.98	9.23	7.21	9.17	6.53	6.8	4.2	7.96	5.6
120	1	2	20		463.38	374.34	21	7	0.19	492	346	496	348	490	350	498	354	522	352	498	356	498	348	520	416	498	348	5.66	-2.26	5.54	-2.7	7.52	-2.07	3.38	-2.76	2.58	-3.12	5.14	-3.33	-2.1	-4.88	-2.77	-2.95	-2	-5.22
121	1	2	20		481.96	366.19	37	7	-0.53	440	394	440	394	440	394	438	394	438	396	440	394	436	398	434	398	436	398	5.16	5.1	5.46	6.15	5.2	4.55	5.17	6.15	5.47	6.65	4.82	5.23	3.53	5.45	3.51	6.64	3.19	5.23
201	2	1	20	8	319.33	349.74	25	31	-0.45	596	572	564	574	596	576	564	624	564	574	596	574	572	338	570	338	546	338	4.28	5.52	4.57	5.31	4.83	5.56	4.09	5.03	3.48	3.47	4.51	5.05	-2.31	-2.51	-0.99	-1.82	-1.83	-2.23
202	2	1	21	8	331.53	290.78	48	18	1.67	414	320	444	320	412	332	444	334	444	334	418	334	444	338	444	336	444	338	17.49	19.61	17.17	20.05	16.56	19.34	19.51	18.07	18.28	19.52	16.99	16.74	16.66	14.69	15.47	14.84	17.85	14.68
203	2	1	21	7	456.61	346.7	40	6	-0.5	490	444	490	392	490	442	488	392	488	392	488	442	486	362	488	330	486	364	8.96	6.26	7.81	5.35	10.64	8.18	5.12	3.85	3.74	2.65	5.7	4.28	1.16	1.19	-0.68	-0.09	2.35	2.11
204	2	1	22	8	357.61	368.25	24	17	-0.52	518	442	518	448	518	444	516	440	516	442	518	408	394	408	392	410	400	408	10.26	9.17	10.85	10.41	10.35	9.12	8.42	8.29	9.44	9.24	4.9	5.46	5.39	6.24	6.21	7.54	4.68	5.29
205	2	1	21	8	236.03	313.97	51	50	0.11	520	492	598	492	598	488	518	440	598	494	598	492	518	438	598	418	518	438	17.58	13.48	16.79	14.19	16.76	12.79	16.77	13.27	15.88	12.45	16.91	13.35	14.92	12.65	14.52	10.9	15.94	12.74
206	2	2	19	7	486.88	408.01	21	8	0.56	510	448	510	448	510	448	510	448	508	448	510	448	508	448	508	448	510	448	9.87	9.02	10.12	9.57	8.29	7.75	7.46	7.45	7.97	7.94	6.43	6.71	4.87	5.91	5.95	7.07	3.82	4.71
207	2	1	20	7	455.08	380.94	4	0	0	452	346	448	342	452	338	452	342	456	342	456	338	458	340	456	340	462	340	7.54	3.04	6.86	3.1	7.67	4.6	7.37	3.94	7.71	5.38	7.46	5.83	6.49	7.4	8.18	7.78	5.22	7.91
208	2	1	21	7	448.4	339.96	48	1	0.19	538	420	538	418	540	420	538	418	536	416	540	420	488	412	518	414	488	412	11.32	8.83	10.75	8.69	11.78	9.25	10.09	8.25	8.23	7.25	10.76	8.22	4.72	5.23	6.15	6.3	3.78	4.3
209	2	1	21	7	377.05	354.84	48	21	0.45	554	484	556	484	554	484	556	484	556	484	554	484	558	484	558	484	558	484	18.2	20.35	17.29	20.58	18.55	20.88	16.72	19.56	14.57	17.76	16.89	18.84	8.34	10.76	9.21	11.83	6.93	8
210	2	1	21	7	496.64	386.99	8	0	0.43	580	498	494	484	576	498	492	498	492	468	576	498	492	498	492	498	492	498	12.09	12.24	12.68	12.74	11.75	11.65	10.99	10.58	12.72	11.72	10.87	11.28	11.63	11.04	12.49	11.64	10.09	10.01
211	2	1	23	8	469.59	351.33	29	0	-0.08	454	498	454	416	454	496	452	330	452	328	454	328	452	330	450	332	452	332	1.55	0.16	1.98	0.74	1.06	0.37	1.57	0.26	1.84	0.74	1.21	-0.55	0.97	0.28	1.04	0.68	0.84	-0.2
212	2	2	20	7.5	413.1	430.75	39	24	0.81	578	462	578	462	576	462	550	462	548	462	550	460	548	460	548	462	550	460	19.29	18.95	18.01	18.23	17.16	17.97	16.91	17.25	17.43	17.52	13.88	14.85	13.76	14.5	14.51	14.85	13.04	14.13
213	2	1	21	8	485.77	384.4	36	0	0.23	474	368	474	370	474	366	474	370	474	370	476	374	474	374	474	376	474	374	7.68	6.57	6.91	5.65	7.28	6.59	6.21	5.86	6.92	5.73	5.42	5.78	3.25	4.13	3.79	3.87	2.71	4.4
214	2	1	21	7	474.83	371.29	18	0	0.48	524	494	524	494	524	494	522	492	522	492	522	466	522	464	522	464	522	464	20.99	20.61	20.08	19.09	19.12	19.15	14.93	12.75	16.46	13.92	11.83	9.36	10.48	7.37	10.38	7.29	0.31	2.97
215	2	2	20	8	473.99	394.69	7	8	0.43	458	350	458	350	458	350	458	350	454	350	458	352	456	354	434	368	458	354	13.24	17.21	11.9	15.93	12.1	15.37	10.48	14.61	8.54	12.61	10.55	13.94	5.66	9.41	3.31	7.13	5.79	8.91
216	2	1	18	7.5	396.17	411.24	7	24	0.48	488	468	490	470	488	468	490	446	490	444	488	468	490	444	490	444	490	446	19.57	18.75	18.58	18.39	18.64	17.74	16.24	16.42	14.83	14.89	15.01	15.71	9.56	10.99	13.41	13.97	11.51	12.21
217	2	1	20	7	520.63	383.39	18	1	0.56	582	470	582	470	584	470	584	438	440	440	598	434	436	386	436	438	434	386	14.8	19.81	14.13	19.4	13.11	17.36	13.28	17.95	13.27	16.53	12.07	15.77	10.54	14.84	9.39	12.38	8.82	13.51
218	2	2	19	8.5	475.3	437.18	10	4	0.11	512	496	548	464	510	446	542	494	544	446	514	398	542	400	542	404	538	340	16.68	15.14	16.27	14.9	13.91	13.42	16.52	13.69	15.59	13.66	14.53	11.9	14.1	11.34	12.21	11.52	11.75	10.63
219	2	2	19	7	457.04	376.88	39	2	-0.38	468	328	468	330	468	328	470	330	468	330	470	330	468	330	468	330	468	330	6.84	13.16	6.59	12.12	5.6	12.2	6.38	11.5	4.95	9.95	6.03	11.29	4.58	8.07	3.18	7.33	4.74	8.73
220	2	2	19	7	473.19	359.41	10	2	0.45	450	316	456	320	448	316	448	318	452	322	446	316	446	318	450	326	444	314	18.07	17.7	17.25	17.15	15.05	15.08	14.51	15.53	15.28	16.15	13.8	15	12.99	13.96	11.93	12.82	11.73	13.32
